# Supplementary material for: Cubic quantum dot/hexagonal microsphere ZnIn2S4 heterophase junctions for exceptional visible-light-driven photocatalytic H2 evolution
Source: Royal Society of Chemistry journal article supplement (doi:10.1039/c7ta01914a), 2017-01-01
Supplement: c7ta01914a1.pdf [file c7ta01914a1.pdf]

## Electronic supplementary information

### **Cubic quantum dot/hexagonal microsphere ZnIn<sub>2</sub>S<sub>4</sub> heterophase junction for exceptional visible-light-driven photocatalytic H<sub>2</sub> evolution**

Jinge Wang,<sup>‡</sup> Yajie Chen,<sup>‡</sup> Wei Zhou, Guohui Tian,<sup>\*</sup> yuting Xiao, Huiying Fu and Honggang Fu<sup>\*</sup>

Key Laboratory of Functional Inorganic Material Chemistry, Ministry of Education of the People's Republic of China, Heilongjiang University, Harbin 150080 P. R. China

Corresponding author: Prof. G. H. Tian and Prof. H. G. Fu, Tel: +86-451-86604330; Fax: +86-451-86661259. \*E-mail address: [tiangh@hlju.edu.cn](mailto:tiangh@hlju.edu.cn); [fuhg@vip.sina.com](mailto:fuhg@vip.sina.com)

Electronic Supplementary Information (ESI) available: Material characterization and performance test of the some catalysts. See DOI: 10.1039/x0xx00000x

<sup>‡</sup> These authors contributed equally to this work.

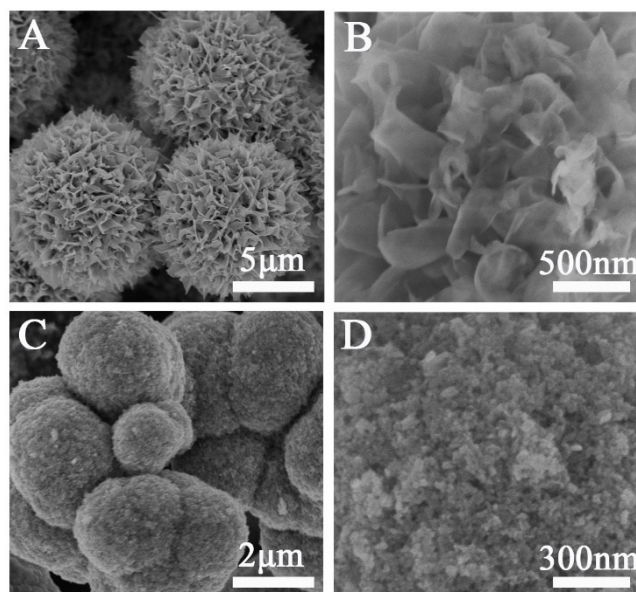

**Fig. S1.** SEM images of the H-ZnIn<sub>2</sub>S<sub>4</sub> (A,B) and C-ZnIn<sub>2</sub>S<sub>4</sub> (C,D) with different magnifications.

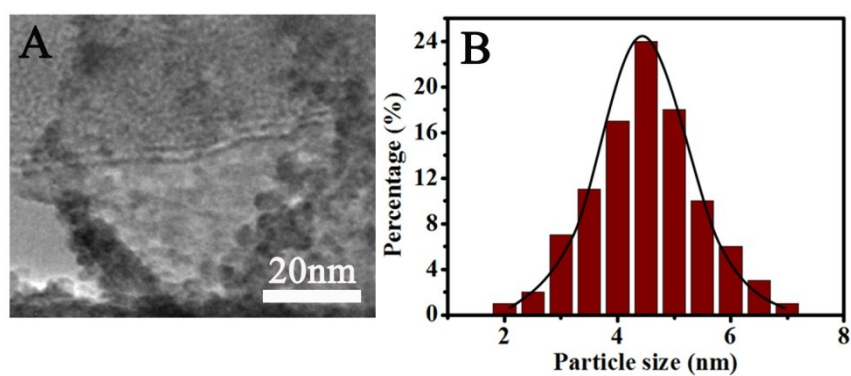

**Fig. S2.** The TEM image (A) of the 1/6J-ZnIn<sub>2</sub>S<sub>4</sub> and corresponding size distribution histogram (B) of the cubic quantum dots in the 1/6J-ZnIn<sub>2</sub>S<sub>4</sub>.

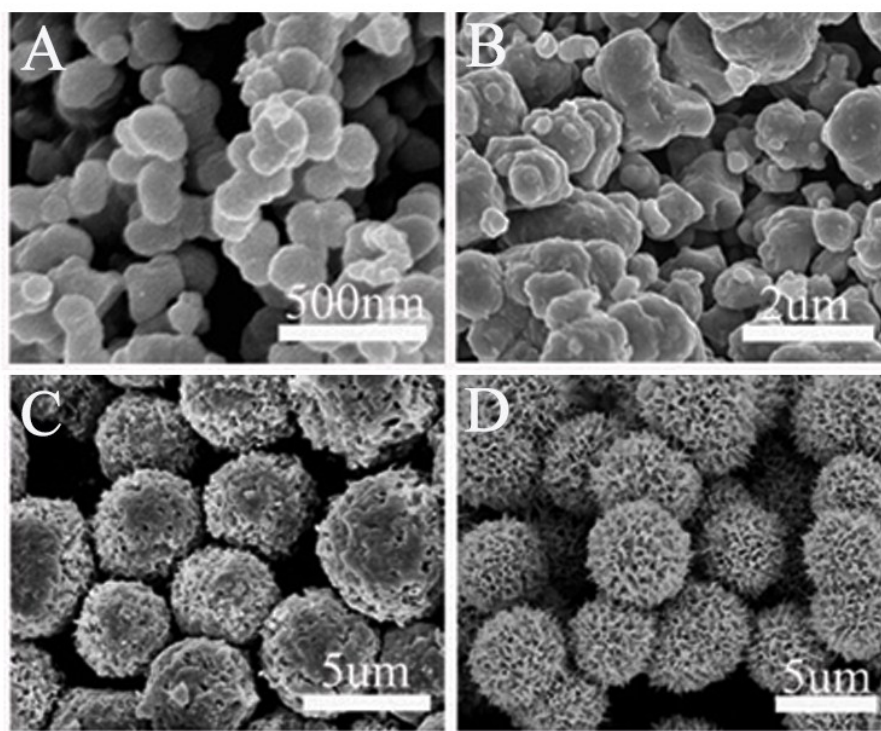

**Fig. S3.** SEM patterns of the prepared  $\text{ZnIn}_2\text{S}_4$  samples obtained from different solvothermal reaction time: (A) 0.5 h, (B) 1 h, (C) 6 h, and (D) 12 h.

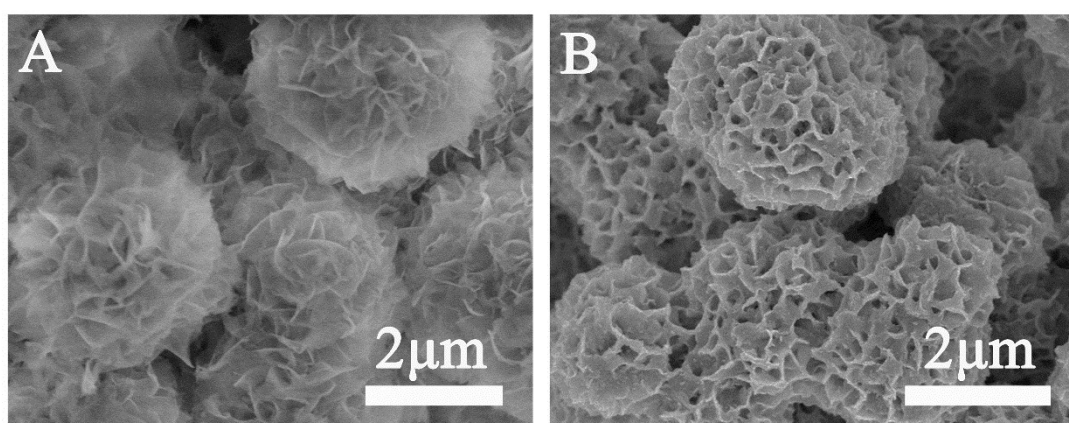

**Fig. S4.** (A) and (B) are the SEM images of the  $1/8\text{J-ZnIn}_2\text{S}_4$  and  $1/4\text{J-ZnIn}_2\text{S}_4$ , respectively.

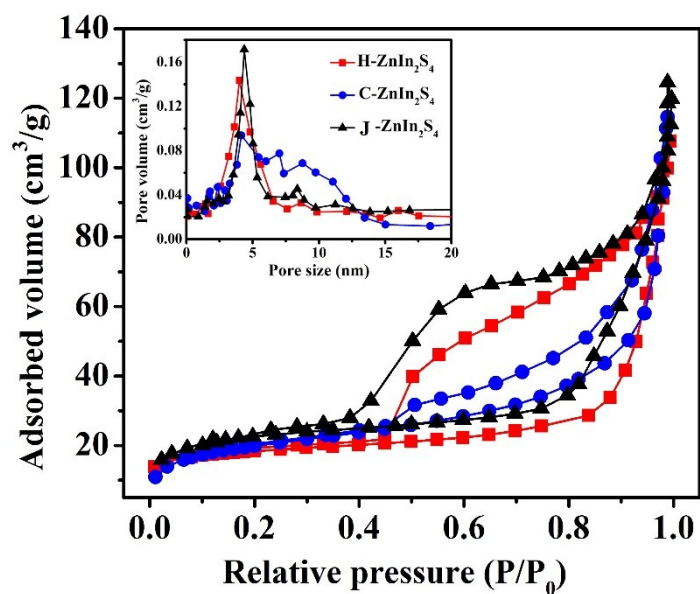

**Fig. S5.** Nitrogen adsorption–desorption isotherms and the pore size distribution plots (inset) of H-ZnIn<sub>2</sub>S<sub>4</sub>, C-ZnIn<sub>2</sub>S<sub>4</sub> and J-ZnIn<sub>2</sub>S<sub>4</sub> (1:6).

**Table S1** The results of N<sub>2</sub> adsorption–desorption isotherm test of the different samples.

| Samples                            | S <sub>BET</sub> (m <sup>2</sup> g <sup>-1</sup> ) | Pore volume (cm <sup>3</sup> g <sup>-1</sup> ) | Average pore size (nm) |
|------------------------------------|----------------------------------------------------|------------------------------------------------|------------------------|
| H-ZnIn <sub>2</sub> S <sub>4</sub> | 63.8                                               | 0.15                                           | 3.2                    |
| J-ZnIn <sub>2</sub> S <sub>4</sub> | 75.5                                               | 0.17                                           | 3.0                    |
| C-ZnIn <sub>2</sub> S <sub>4</sub> | 32.3                                               | 0.10                                           | 2.8                    |

**Table S2** Summary of the photoluminescence decay time ( $\tau$ ) and their relative intensities of the different samples.

| sample                             | $\tau_1$ (ns) | $\tau_2$ (ns) | $I_1$ (%) | $I_2$ (%) | Average lifetime ( $\tau$ , ns) |
|------------------------------------|---------------|---------------|-----------|-----------|---------------------------------|
| J-ZnIn <sub>2</sub> S <sub>4</sub> | 2.19          | 9.78          | 27.97     | 72.03     | 9.35                            |
| H-ZnIn <sub>2</sub> S <sub>4</sub> | 1.68          | 8.16          | 32.68     | 67.32     | 8.47                            |
| C-ZnIn <sub>2</sub> S <sub>4</sub> | 1.55          | 7.65          | 33.55     | 66.45     | 5.48                            |

The average lifetime was calculated using equation:  $\langle\tau\rangle=(I_1\tau_1^2 + I_2\tau_2^2)/(I_1\tau_1 + I_2\tau_2)$

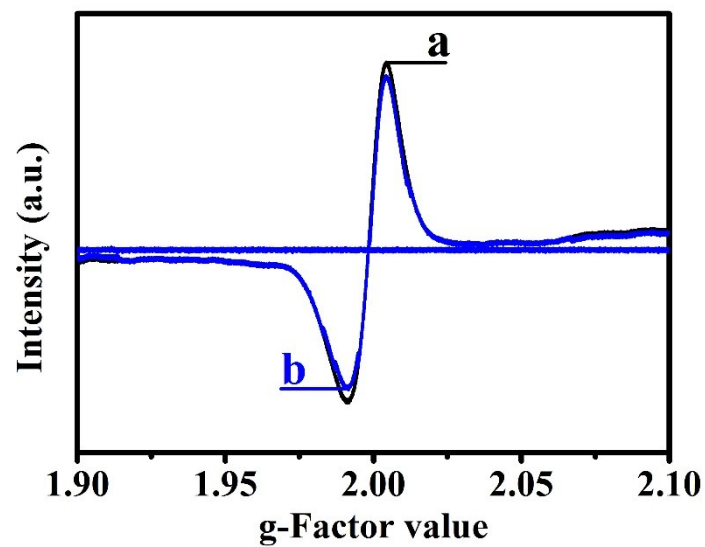

**Fig. S6.** Room-temperature electron spin resonance (ESR) lines of H-ZnIn<sub>2</sub>S<sub>4</sub> (a) and the control sample after further hydrothermal process under pure water of H-ZnIn<sub>2</sub>S<sub>4</sub> (b).

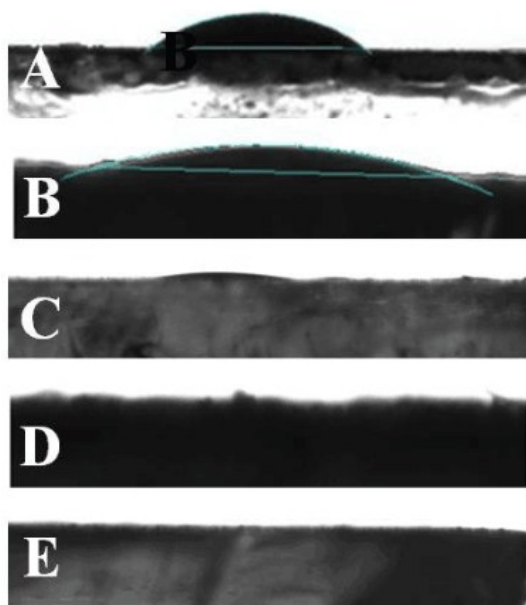

**Fig. S7.** (A)-(E) are the water contact angle photographs of C-ZnIn<sub>2</sub>S<sub>4</sub>, H-ZnIn<sub>2</sub>S<sub>4</sub>, 1/8J-ZnIn<sub>2</sub>S<sub>4</sub>, 1/6J-ZnIn<sub>2</sub>S<sub>4</sub>, and 1/4J-ZnIn<sub>2</sub>S<sub>4</sub> under dark, respectively.

**Table S3** Values of the parameters resulted from fitting the impedance spectra of the different samples using the equivalent circuit Figure 5C.

| Samples                            | $R_s$<br>( $\Omega \text{ cm}^2$ ) | CPE1<br>( $\text{F cm}^{-2}$ ) | $R_1$<br>( $\Omega \text{ cm}^2$ ) | CPE2<br>( $\text{F cm}^{-2}$ ) | $R_{ct}$<br>( $\Omega \text{ cm}^2$ ) |
|------------------------------------|------------------------------------|--------------------------------|------------------------------------|--------------------------------|---------------------------------------|
| J-ZnIn <sub>2</sub> S <sub>4</sub> | 58.03                              | $7.565 \times 10^{-4}$         | 18.86                              | $5.065 \times 10^{-4}$         | 150.5                                 |
| H-ZnIn <sub>2</sub> S <sub>4</sub> | 59.35                              | $2.967 \times 10^{-3}$         | 20.55                              | $6.416 \times 10^{-4}$         | 241.2                                 |
| C-ZnIn <sub>2</sub> S <sub>4</sub> | 59.98                              | $4.856 \times 10^{-3}$         | 22.73                              | $6.815 \times 10^{-4}$         | 320.2                                 |

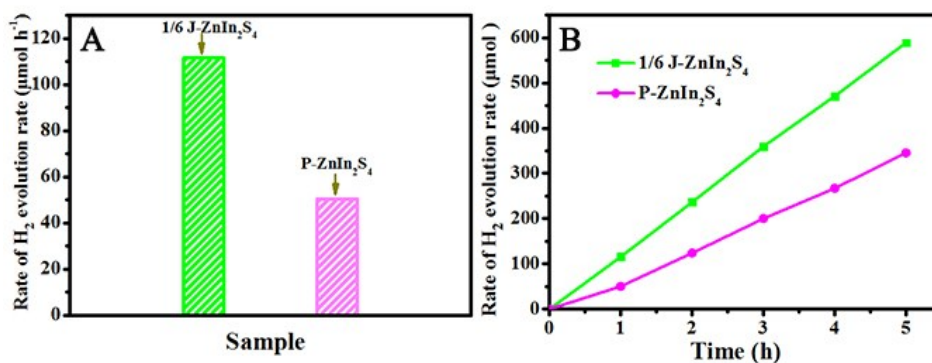

**Fig. S8.** Comparison of the photocatalytic H<sub>2</sub> evolution rate of 1/6J-ZnIn<sub>2</sub>S<sub>4</sub> and the P-ZnIn<sub>2</sub>S<sub>4</sub> (physically mixed C-ZnIn<sub>2</sub>S<sub>4</sub> and H-ZnIn<sub>2</sub>S<sub>4</sub>) (A), different reaction times (B).

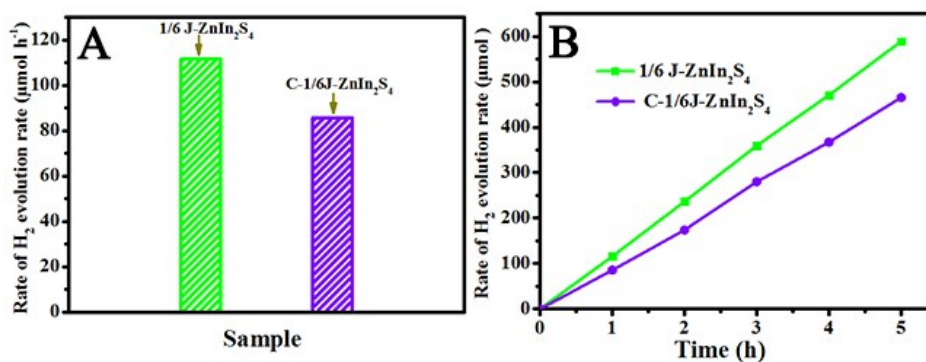

**Fig. S9.** Comparison of the photocatalytic H<sub>2</sub> evolution rate of 1/6J-ZnIn<sub>2</sub>S<sub>4</sub> and the crushed 1/6J-ZnIn<sub>2</sub>S<sub>4</sub> (C-1/6J-ZnIn<sub>2</sub>S<sub>4</sub>) (A), different reaction times (B).



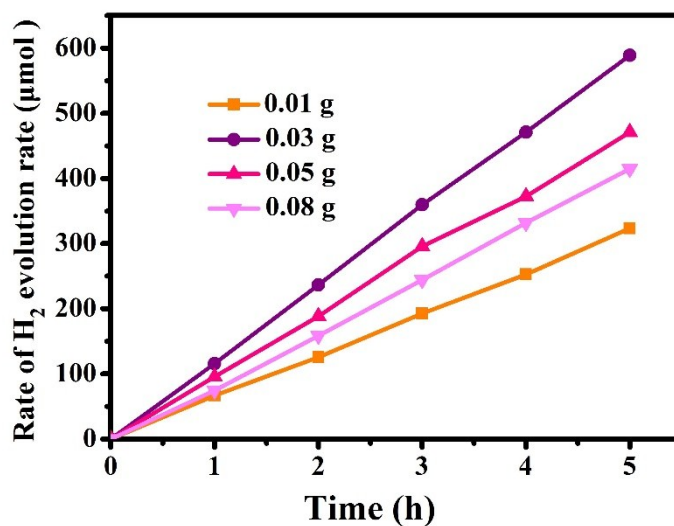

**Fig. S10.** Photocatalytic H<sub>2</sub> evolution of the 1/6J-ZnIn<sub>2</sub>S<sub>4</sub> samples with different amounts.

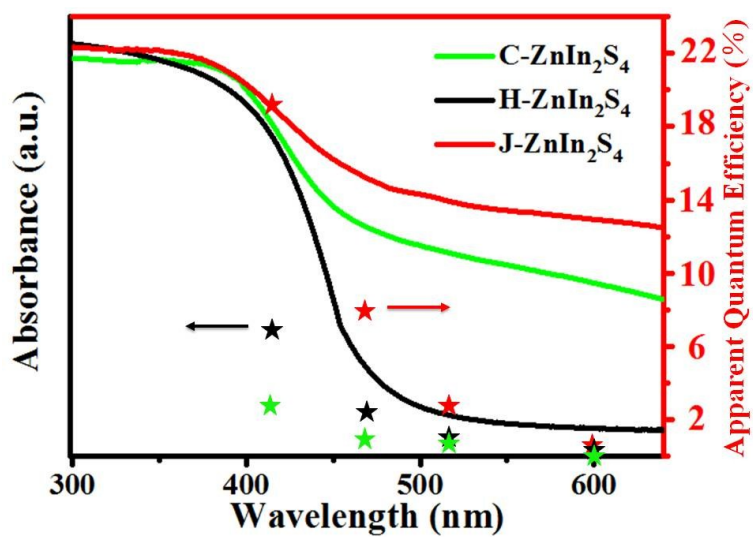

**Fig. S11.** The H<sub>2</sub> evolution rates of the different samples plotted against wavelength of monochromatic light.

**Table S4** The apparent quantum efficiency (AQE) of the different samples under different illumination wavelength.

| Sample                             | Apparent Quantum Efficiency (AQE) |        |        |        |
|------------------------------------|-----------------------------------|--------|--------|--------|
|                                    | 420 nm                            | 470 nm | 520 nm | 600 nm |
| J-ZnIn <sub>2</sub> S <sub>4</sub> | 18.67%                            | 8.20%  | 2.12%  | 0.91%  |
| H-ZnIn <sub>2</sub> S <sub>4</sub> | 6.43%                             | 2.01%  | 0.69%  | 0.15%  |
| C-ZnIn <sub>2</sub> S <sub>4</sub> | 3.18%                             | 1.17%  | 0.12%  | 0.08%  |

**Table S5** The performance comparison of the catalysts from the different references.

| Catalyst                                                          | Apparent Quantum Efficiency (AQE) at 420 nm | Photocatalytic H <sub>2</sub> Evolution Rate (μmol h <sup>-1</sup> ) | Reference |
|-------------------------------------------------------------------|---------------------------------------------|----------------------------------------------------------------------|-----------|
| J-ZnIn <sub>2</sub> S <sub>4</sub>                                | 18.67%                                      | 114.2                                                                | This Work |
| La-ZnIn <sub>2</sub> S <sub>4</sub>                               | 8.83%                                       | 116.68                                                               | (1)       |
| ZnIn <sub>2</sub> S <sub>4</sub>                                  | 4.11%                                       | 49.78                                                                | (2)       |
| RGO-ZnIn <sub>2</sub> S <sub>4</sub>                              | --                                          | 81.6                                                                 | (3)       |
| ZnIn <sub>2</sub> S <sub>4</sub> -CTAB                            | 11.9%                                       | 122.2                                                                | (4)       |
| MoS <sub>2</sub> /ZnIn <sub>2</sub> S <sub>4</sub>                | --                                          | 47.71                                                                | (5)       |
| Ag/ZnIn <sub>2</sub> S <sub>4</sub> /TiO <sub>2</sub>             | 0.18%                                       | 33.1                                                                 | (6)       |
| ZnIn <sub>2</sub> S <sub>4</sub> /g-C <sub>3</sub> N <sub>4</sub> | 0.28%                                       | 14.1                                                                 | (7)       |

## References

- (1) F. Tian, R. S. Zhu, K. L. Song, O. Y. Feng and G. Cao, *Int J Hydrogen Energy* 2015, **40**, 2141-2148.
- (2) F. Tian, R. S. Zhu, K. L. Song, M. L. Niu, O. Y. Feng and G. Cao, *Mater. Res. Bull* 2015, **70**, 645–650.
- (3) J. Zhou, G. H. Tian, Y. J. Chen, X. Y. Meng, Y. H. Shi, X. R. Cao, K. Pan and H. G. Fu, *Chem. Commun.* 2013, **49**, 2237-2239.
- (4) S. H. Shen, L. Zhao and L. J. Guo, *Mater. Res. Bull* 2009, **44**, 100-105.
- (5) W. Y. Lim, M. H. Hong and G. W. Ho, *Dalton Trans.* 2016, **45**, 552-560.
- (6) Z. Y. Zhang, Y. Z. Huang, K. C. Liu, L. J. Guo, Q. Yuan and B. Dong, *Adv. Mater.* 2015, **27**, 5906-5914.
- (7) Z. Y. Zhang, K. C. Liu, Z. Q. Feng, Y. N. Bao and B. Dong, *Sci. Reports.* 2016, **6**, 19221-19230.

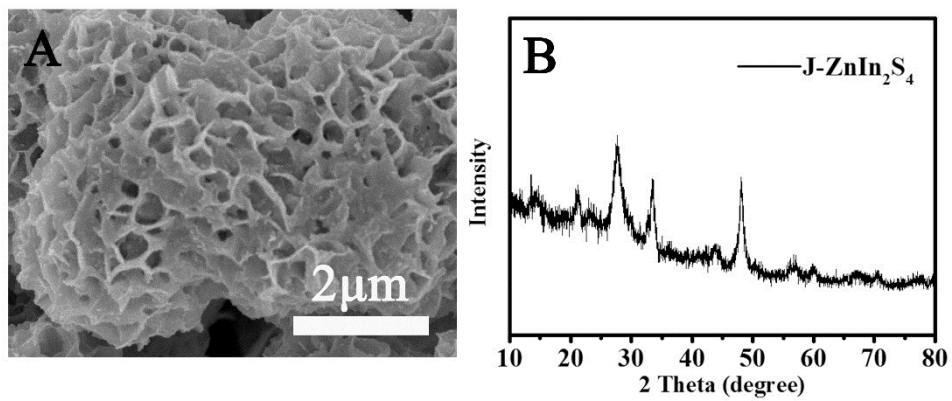

**Fig. S12.** SEM image (A) and XRD pattern of the J-ZnIn<sub>2</sub>S<sub>4</sub> after photocatalytic H<sub>2</sub> evolution reaction.
